# Supplementary material for: DDX24 Negatively Regulates Cytosolic RNA-Mediated Innate Immune Signaling
Source: PubMed Central journal article supplement (PMC3814876; doi:10.1371/journal.ppat.1003721), 2013-10-31

**A**

10 20 30 40 50 60 70 80 90 100

Human DDX24 MKLRDTRSRPPOSSCGKFCIKGIRVVGKRWKVKIDPNMFADGQDDLVCFEELTDYQLVSPARKNPSLFS--KEAPKRKAQAVSEEEEEEGKSSSPKKKI  
 Mouse DDX24 MKVKEITNSKPLASRGTFQRKGIKIVGKWKQVITDPNMFADGQDDLVCFEELTDYRLVK---NPSRLFSSEETKRKAQAVSEEEEEEGCSSSPKKKI

110 120 130 140 150 160 170 180 190 200

Human DDX24 KLKRSKNVLA--TEGTSTCKEVEVDPELEAQGDDMVQDDPEAGEMTSEMIVCTAPRKKKNGKKGLEPSQSTAAKVPKRAK--TWIPEVHDQKADVSAWRD  
 Mouse DDX24 KLKKORDAARAAGEAAGNEVEVKASEPEAQGEVTAQSDQKVGAKSESLEACAAPRKKKNGKKGKLDTFQSTSPKLPKSKKKTMMAEVHDQKADVSAWRD

210 220 230 240 250 260 270 280 290 300

Human DDX24 LFVPRPVLRAISFLGFSAPTPIQALTLAPAIRDKLDILGAAETGSGKTLAFAIPMIHAVLQWRNMAAPPSSMTEAPPGETRTEAGRETSPGKAAEASD  
 Mouse DDX24 LFVPRKAVLRAISFLGFSAPTPIQALTLAPAIRDKLDILGAAETGSGKTLAFAIPMIHESVLQWRNMAAPPSPTEPSTGMPPREMRFGATRHLCSEPKDRTESG

310 320 330 340 350 360 370 380 390 400

Human DDX24 ALPDDTVIESEALPSDIAAEERAKTGGTVSDQALLFGDDDAGEGSSLIIEKVPVKQNEEENLDDRECTGMLKQELDDKSATCKAYPKRPLLGLVLTPT  
 Mouse DDX24 VLPEEARLIEEACPSDSGVQNTPEISASASACTLLVCDDDAGEGSSLE-EKVPVKQNEDEGEEKFDAECAGKLEKQELCDQIAIYKVPKRRPLLGLVLTPT

410 420 430 440 450 460 470 480 490 500

Human DDX24 RELAVQVROHIDAVARFTGIRTAIVLGGMSQKQQRMLNRPEIVWATPGRLWELIIEKHYHLRNLRQLRCLVWDEADRMVEKGFHAELSOLLEMLNDSQ  
 Mouse DDX24 RELAVQVROHIDAVAKFTGINTAIVLGGMSQKQQRMLNRPEIVVIATPGRLWELVKEKHPHLSNLRQLRCLVWDEADRMVEKGFHAELSOLLEMLNDSQ

510 520 530 540 550 560 570 580 590 600

Human DDX24 YNPKRQTLVFSATLTLVHQAPARILHKKHTKKMDKTKLDDLQKQVIGMRGPKVIDLTRNEATVETLTETKIHCEDEKDFLYYYFLMQYVGRSLVFAVNS  
 Mouse DDX24 YNPSRQTLVFSATLTLVHQAPARILHKKHVKKMDKTKLDDLQKQVIGMRGPKVIDLTRERGTVETLTETKIHCEDEKDFLYYYFLMQYVGRSLVFAVNS

610 620 630 640 650 660 670 680 690 700

Human DDX24 ISCIKRLSGLLKVLVDIMPLTLHACMHQQRRLRNLEQFARLEDCVLLATDVAARGLDIPKQVHVHYQVPTSEIYVHRSRGTARAINEGLSLMLIGPEDV  
 Mouse DDX24 ISCIKRLSGLLKVLVDIMPLTLHACMHQQRRLRNLEQFARLEDCVLLATDVAARGLDIPKQVHVHYQVPTSEIYVHRSRGTARAAASEGLSLMLIGPEDV

710 720 730 740 750 760 770 780 790 800

Human DDX24 INFKKIYKTLKQKDEDIPLFPVQTKYMDVVKERIRLARQIEKSEYRNFQAQLHNSWIEQAAAALIELEEDMYKGGKADQOEERRRQKQMKVLEKELRHLL  
 Mouse DDX24 INFKKIYKTLKQKDEDIPLFPVQSKYMDVVKERIRLARQIEKSEYRNFQAQLHNSWIEQAAAALIELEEDMYKGGKADQOEERRRQKQMKVLEKELRHLL

810 820 830 840 850 860

Human DDX24 SQPLFTESQKTRHYPTQSGKPPLLVTSAPSSESALSCLSKQKTKKPKPEQPEQPPSTSAN  
 Mouse DDX24 SQPLFQENLKRHYPTQSGRPPQPVLLASRNIESALSCLSRQRRR-KPKKEPR-APPQGSST

**B**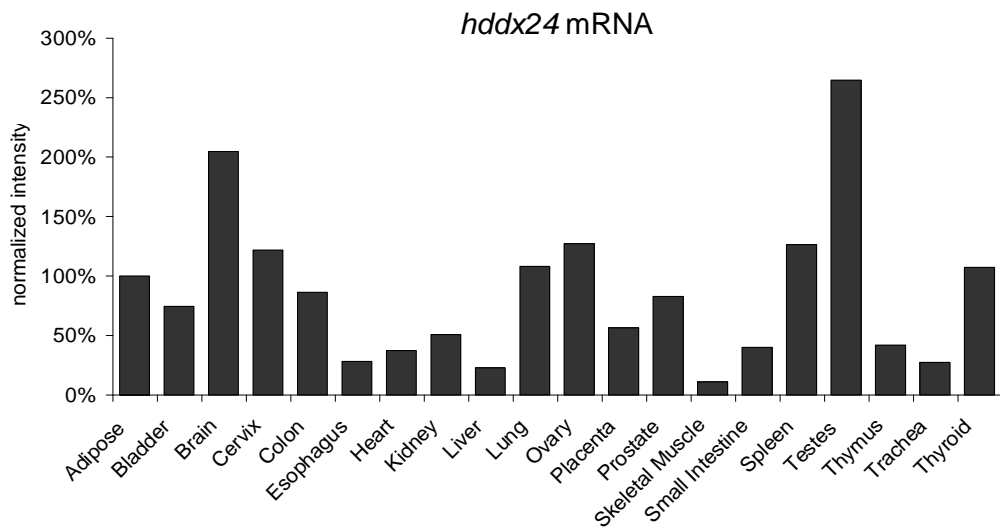

Supplement: ppat.1003721.s001.pdf [file ppat.1003721.s001.pdf]
