# Supplementary material for: DDX24 Negatively Regulates Cytosolic RNA-Mediated Innate Immune Signaling
Source: PubMed Central journal article supplement (PMC3814876; doi:10.1371/journal.ppat.1003721), 2013-10-31
Supplement: ppat.1003721.s002.pdf [file ppat.1003721.s002.pdf]

**A**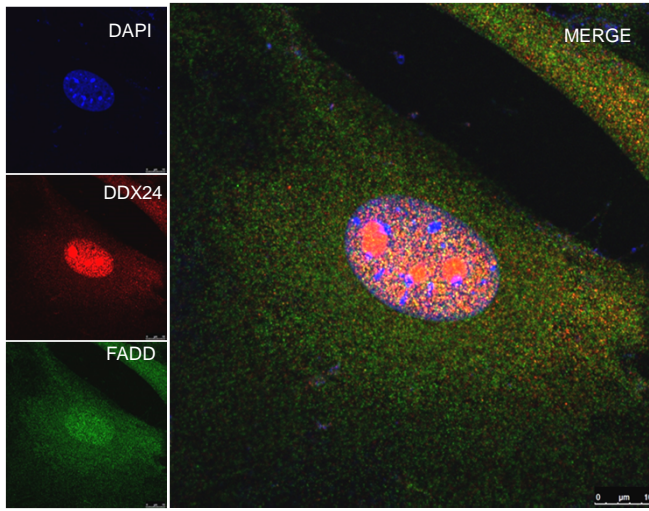

MEF

**B**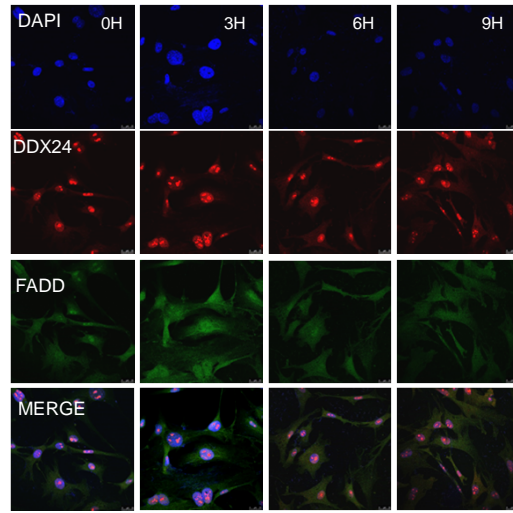

MEF poly I:C treatment

**C**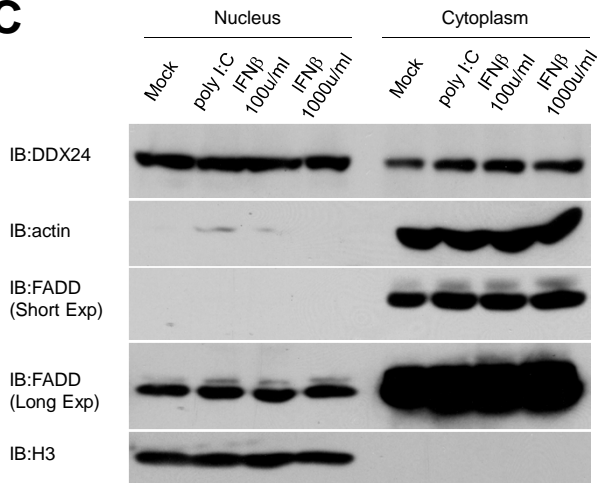

HUVEC

**D**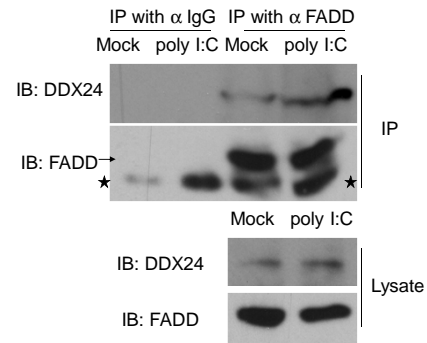

MEF

**E**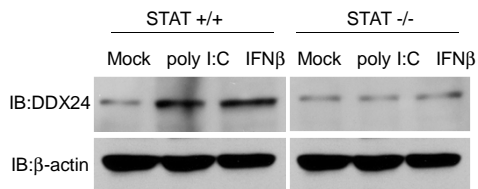

MEF

**F**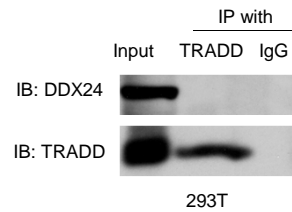

293T
