# Supplementary material for: DDX24 Negatively Regulates Cytosolic RNA-Mediated Innate Immune Signaling
Source: PubMed Central journal article supplement (PMC3814876; doi:10.1371/journal.ppat.1003721), 2013-10-31

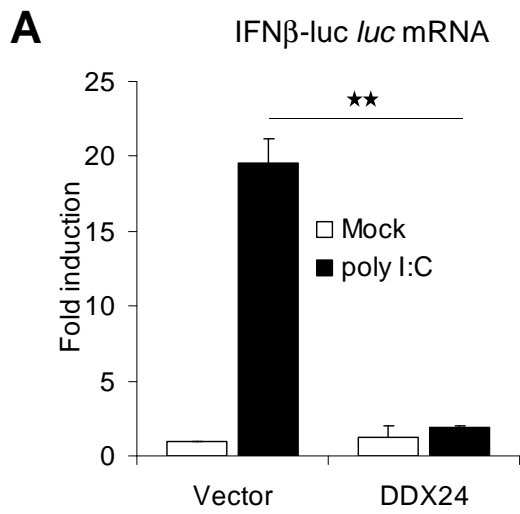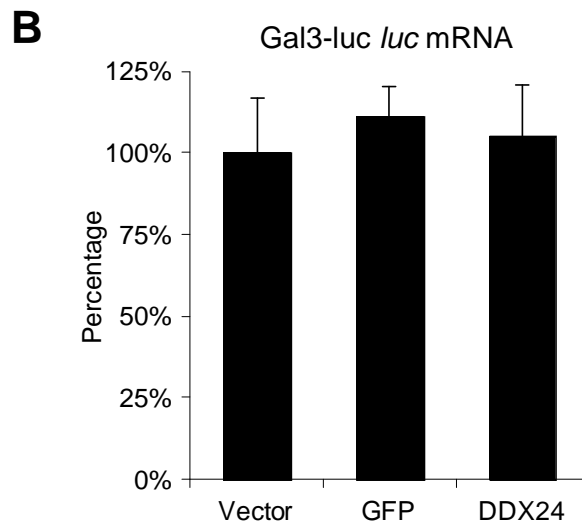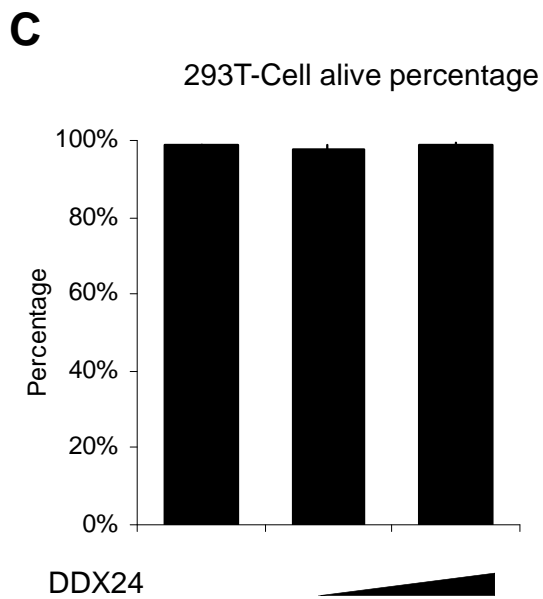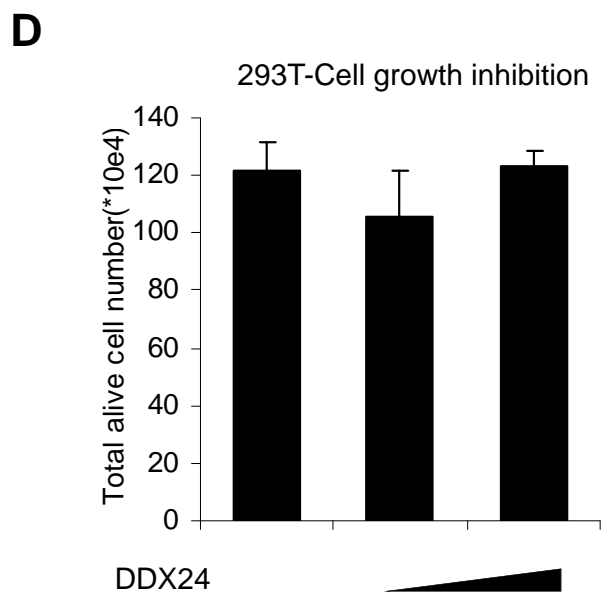

Supplement: ppat.1003721.s004.pdf [file ppat.1003721.s004.pdf]
