# Supplementary material for: DDX24 Negatively Regulates Cytosolic RNA-Mediated Innate Immune Signaling
Source: PubMed Central journal article supplement (PMC3814876; doi:10.1371/journal.ppat.1003721), 2013-10-31

**A**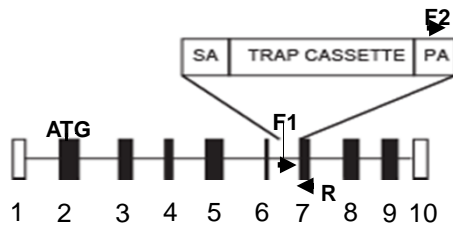**B**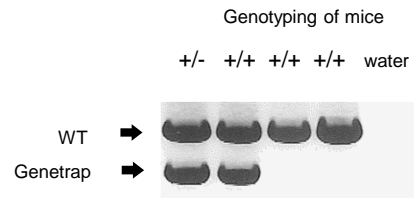**C**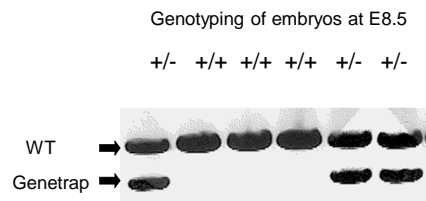**D**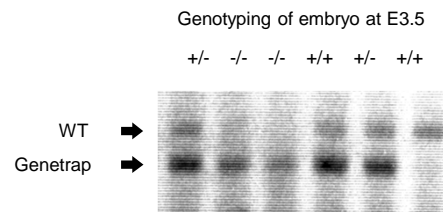**E**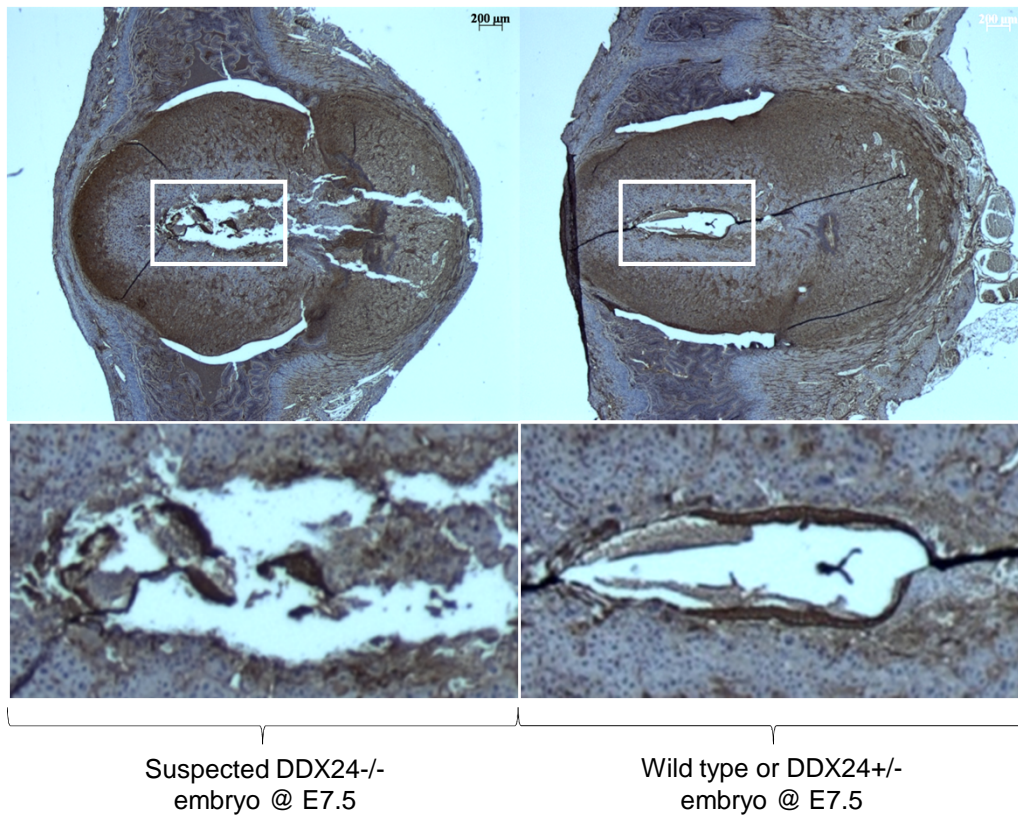

Supplement: ppat.1003721.s006.pdf [file ppat.1003721.s006.pdf]
